# Supplementary material
Source: PubMed Central journal article supplement (PMC5774849)

Figure S1

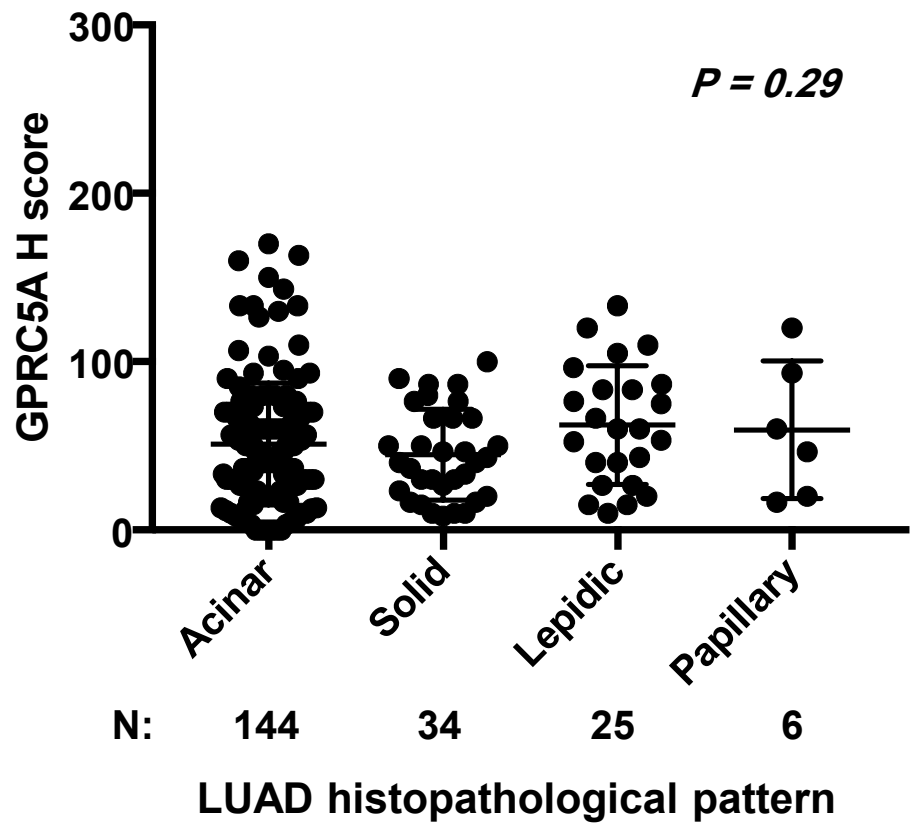

**Figure S2**

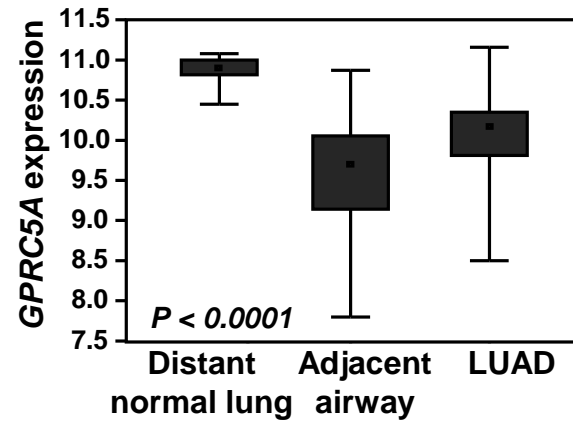

**Figure S3**

**Normal lung**

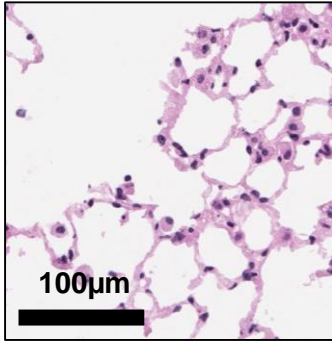

**Hyperplasia**

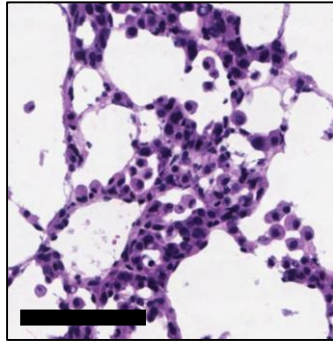

**Adenoma**

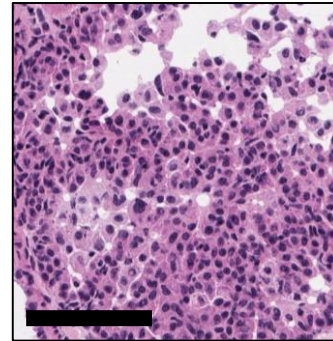

**Adenocarcinoma**

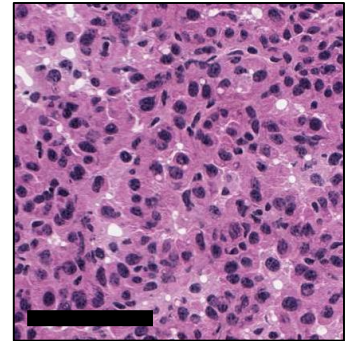

**Figure S4**

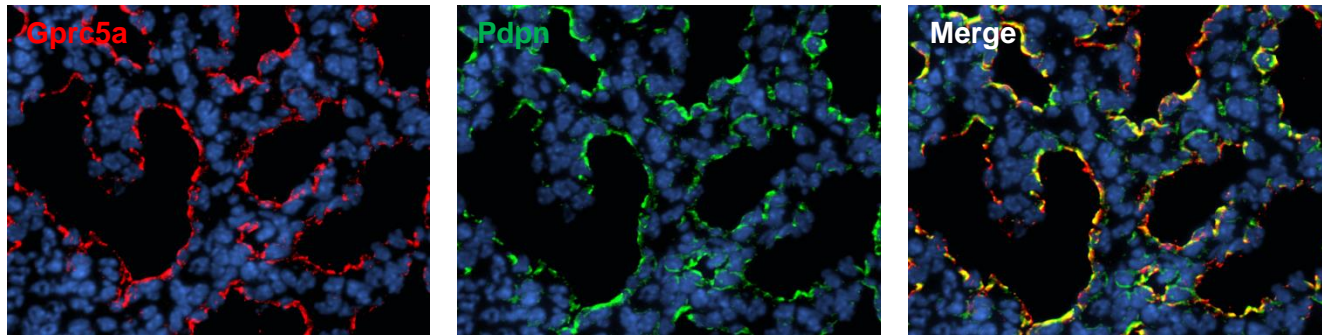

**Figure S5**

CD45-/CD31-/Epcam+  
Pdpn+/-

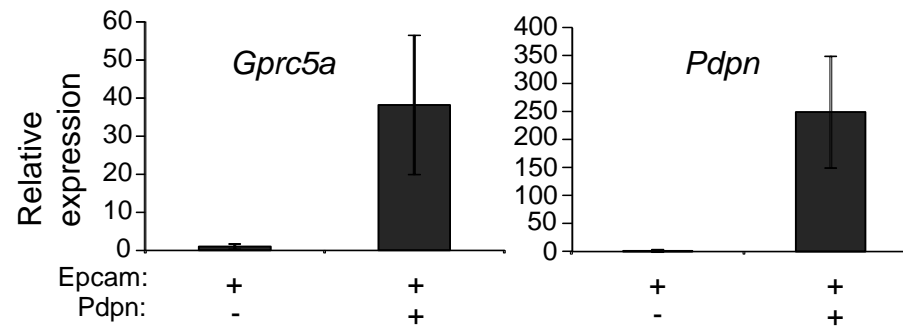

**Figure S6**

**Without NNK**

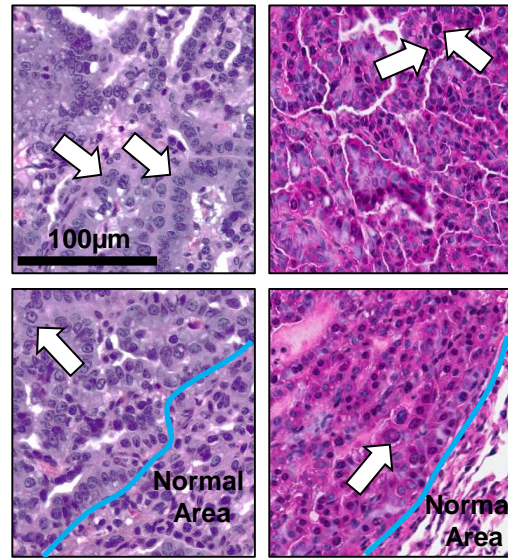

**With NNK**

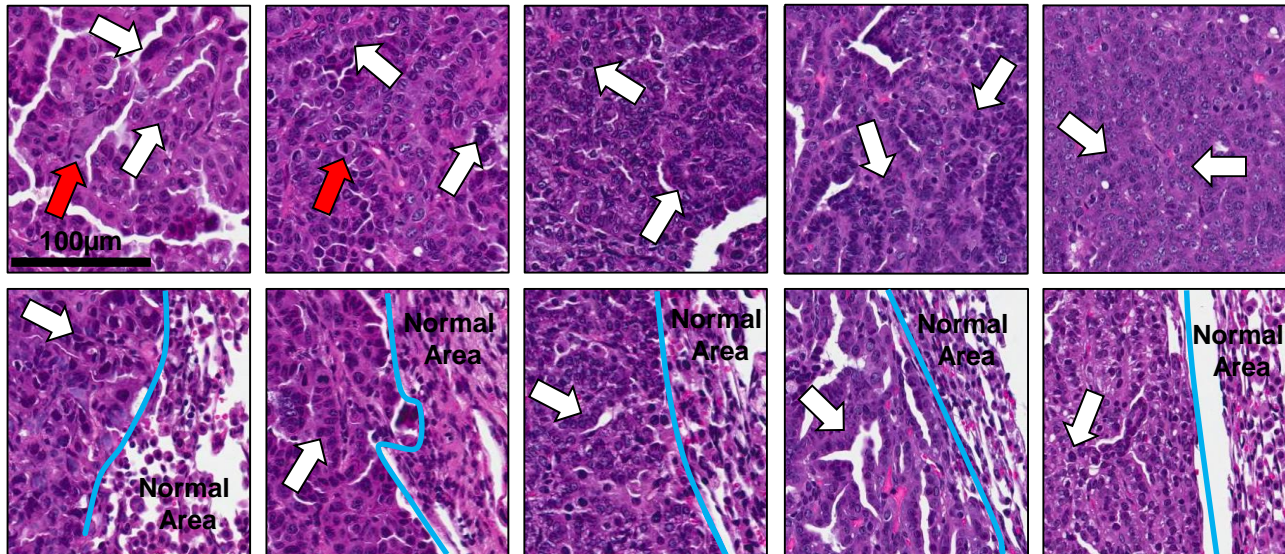

**Months after NNK:**

5

6

6

7

7

# Figure S7

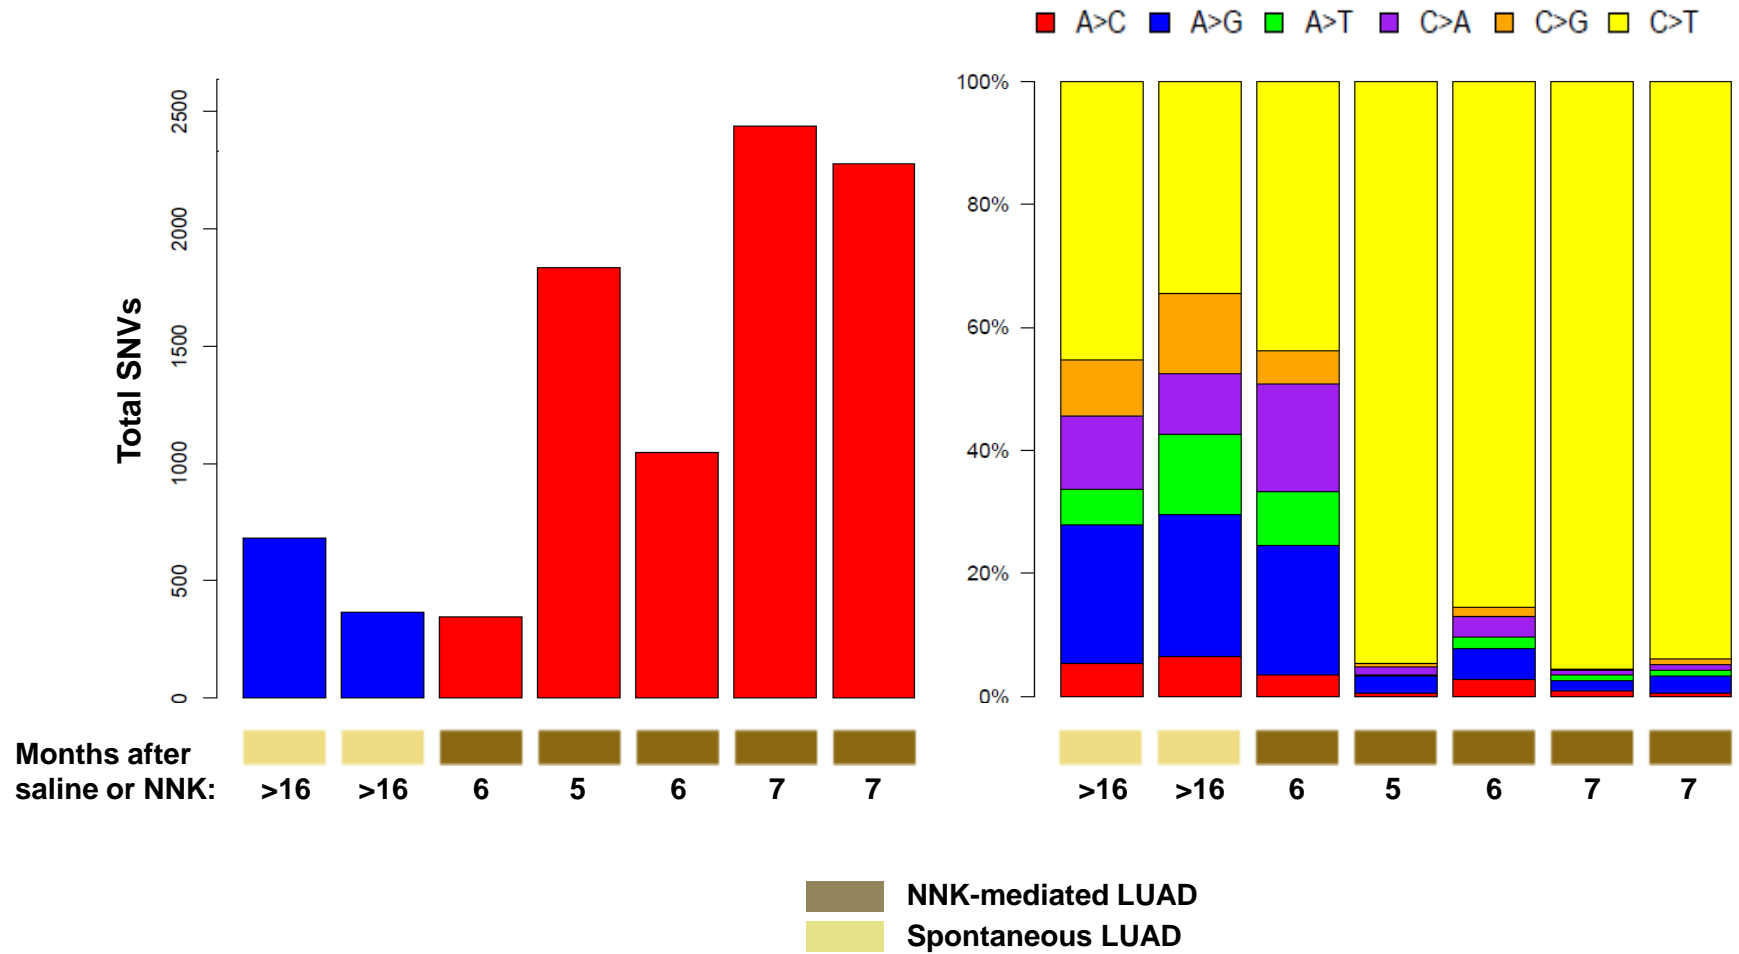

# Figure S8

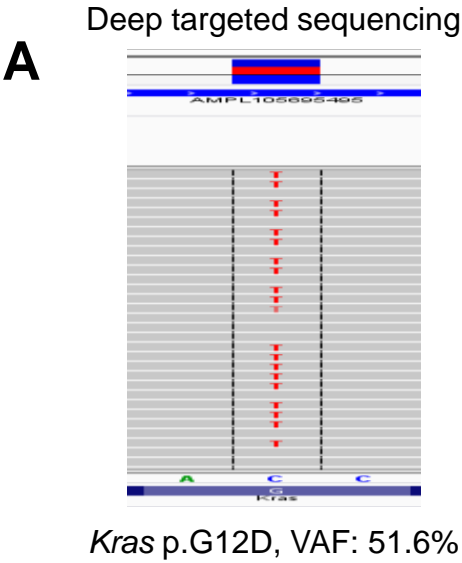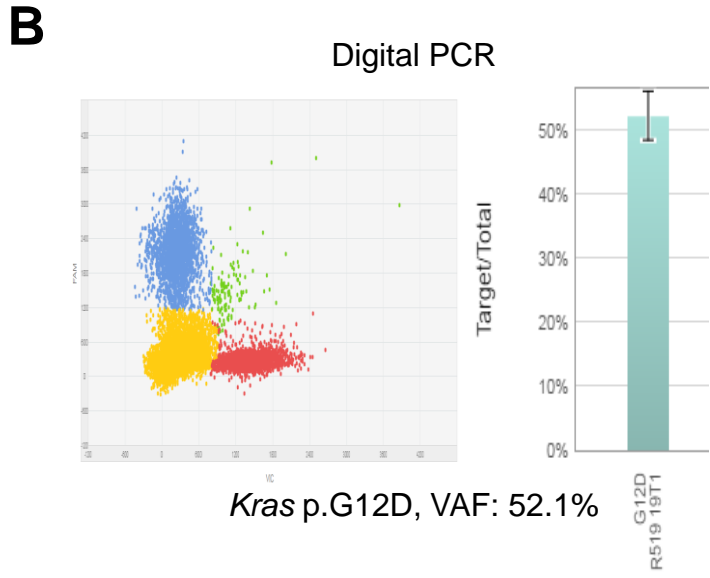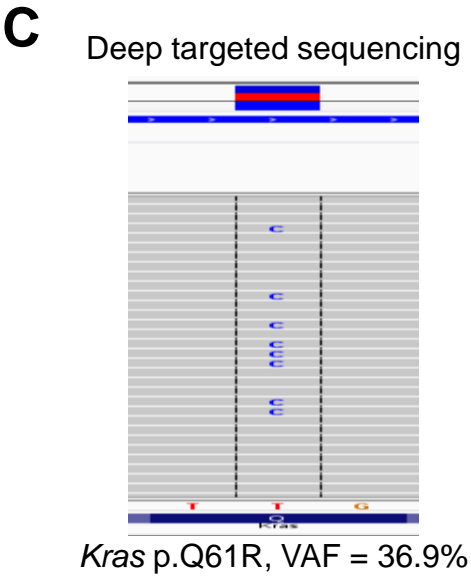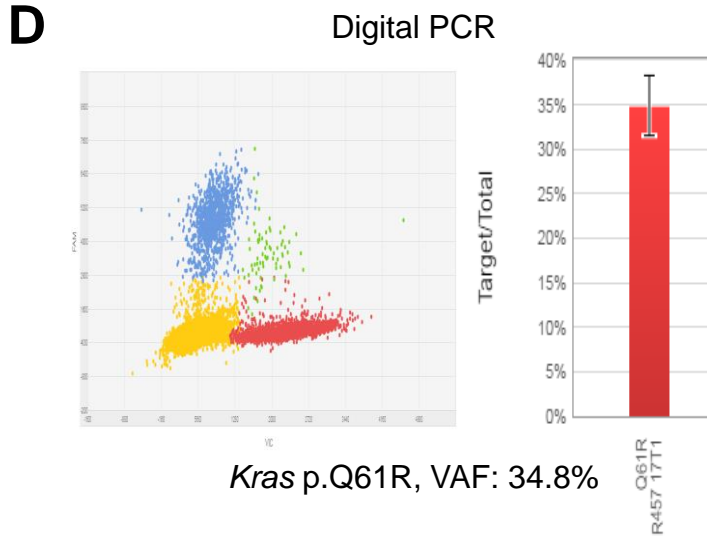



Figure S9

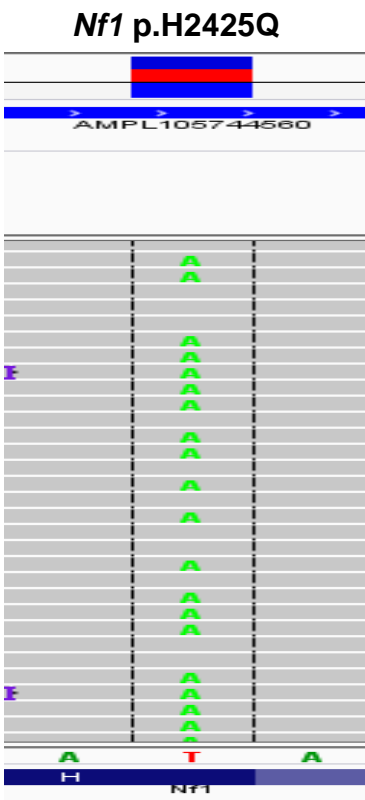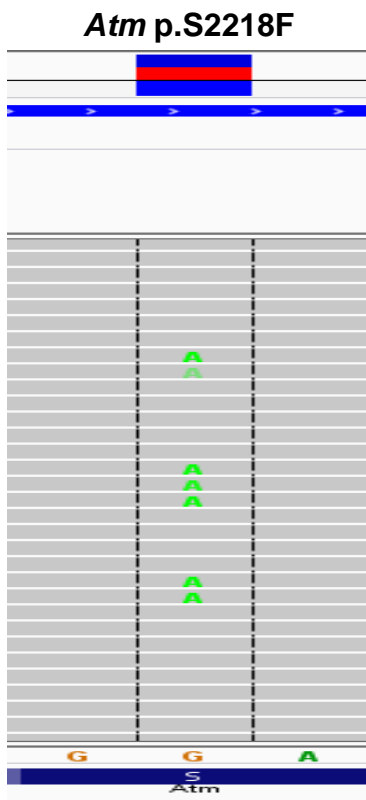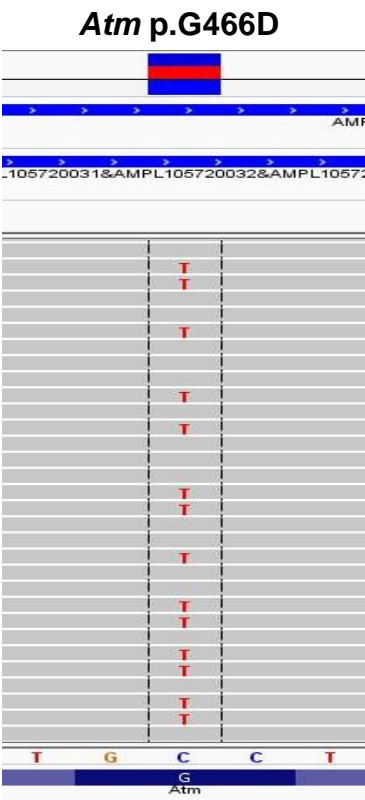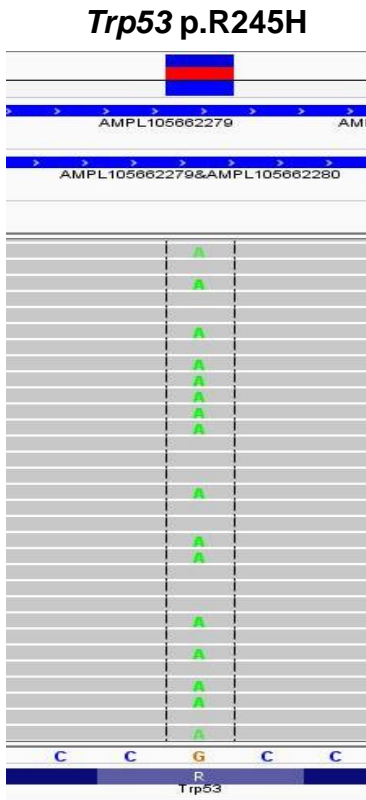

Figure S10

A

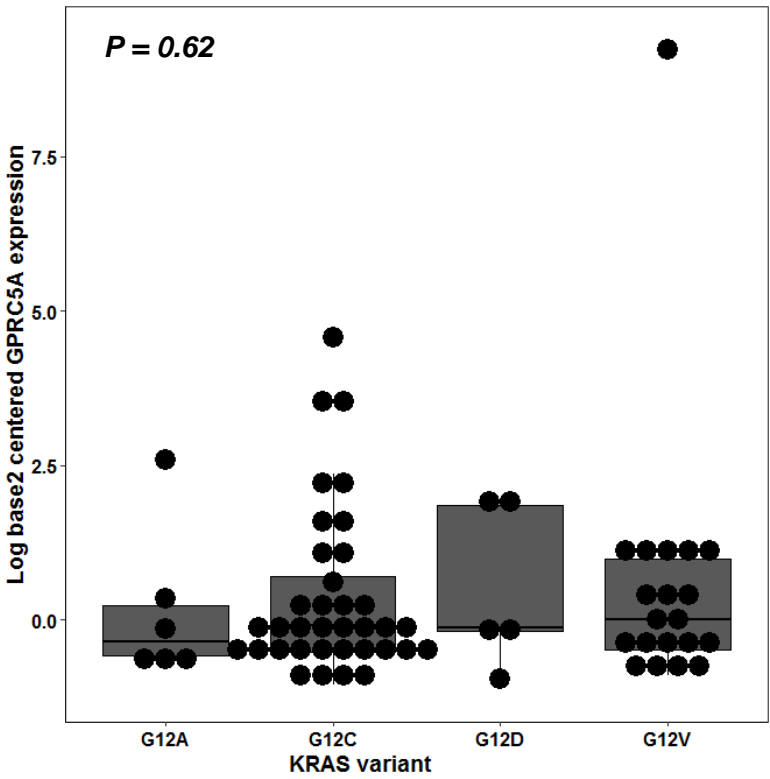

B

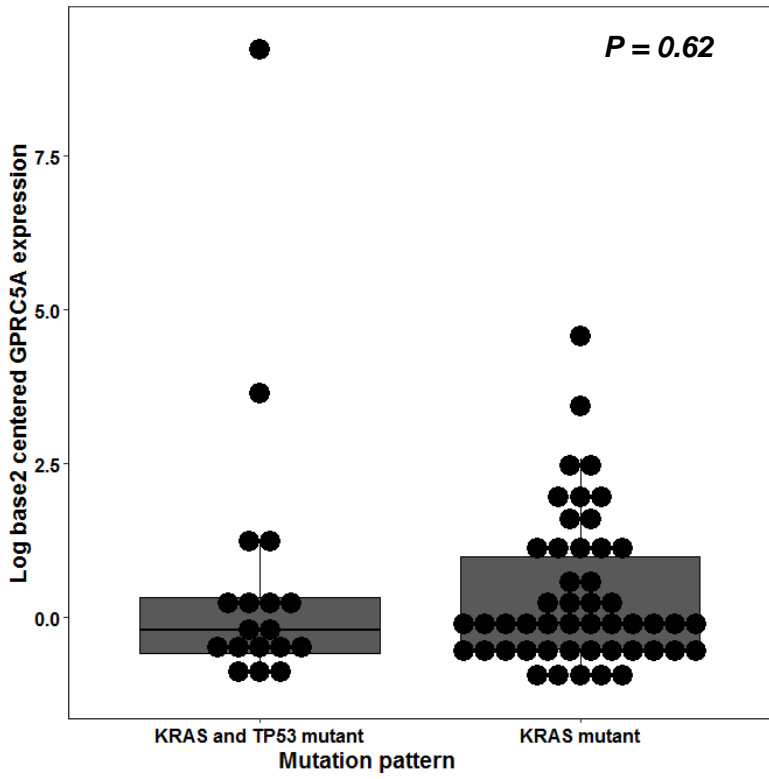

Supplement: NIHMS929557-supplement-Supp_FigS1-10.pdf [file NIHMS929557-supplement-Supp_FigS1-10.pdf]
